# Supplementary material for: Metage2Metabo, microbiota-scale metabolic complementarity for the identification of key species
Source: eLife journal article supplement (doi:10.7554/elife.61968), 2020-12-29
Supplement: supp [file elife-61968-supp-v1.zip]

Archive with 8 entries (8 files):
- elife_poa_e61968_Transparent_Reporting_File.pdf
- elife_poa_e61968_Figure_3_figure_supplement_1.pdf
- elife_poa_e61968_Figure_3_figure_supplement_2.pdf
- elife_poa_e61968_Figure_3_figure_supplement_3.pdf
- elife_poa_e61968_Figure_3_figure_supplement_4.pdf
- elife_poa_e61968_Figure_3_figure_supplement_5.pdf
- elife_poa_e61968_Figure_3_figure_supplement_6.pdf
- elife_poa_e61968_Supplementary_file_1.xlsx
