# Supplementary material for: Metage2Metabo, microbiota-scale metabolic complementarity for the identification of key species
Source: eLife journal article supplement (doi:10.7554/elife.61968), 2020-12-29
Supplement: supp [file elife-61968-supp-v1.zip › elife_poa_e61968_Figure_3_figure_supplement_4.pdf]

Aromatic  
compounds

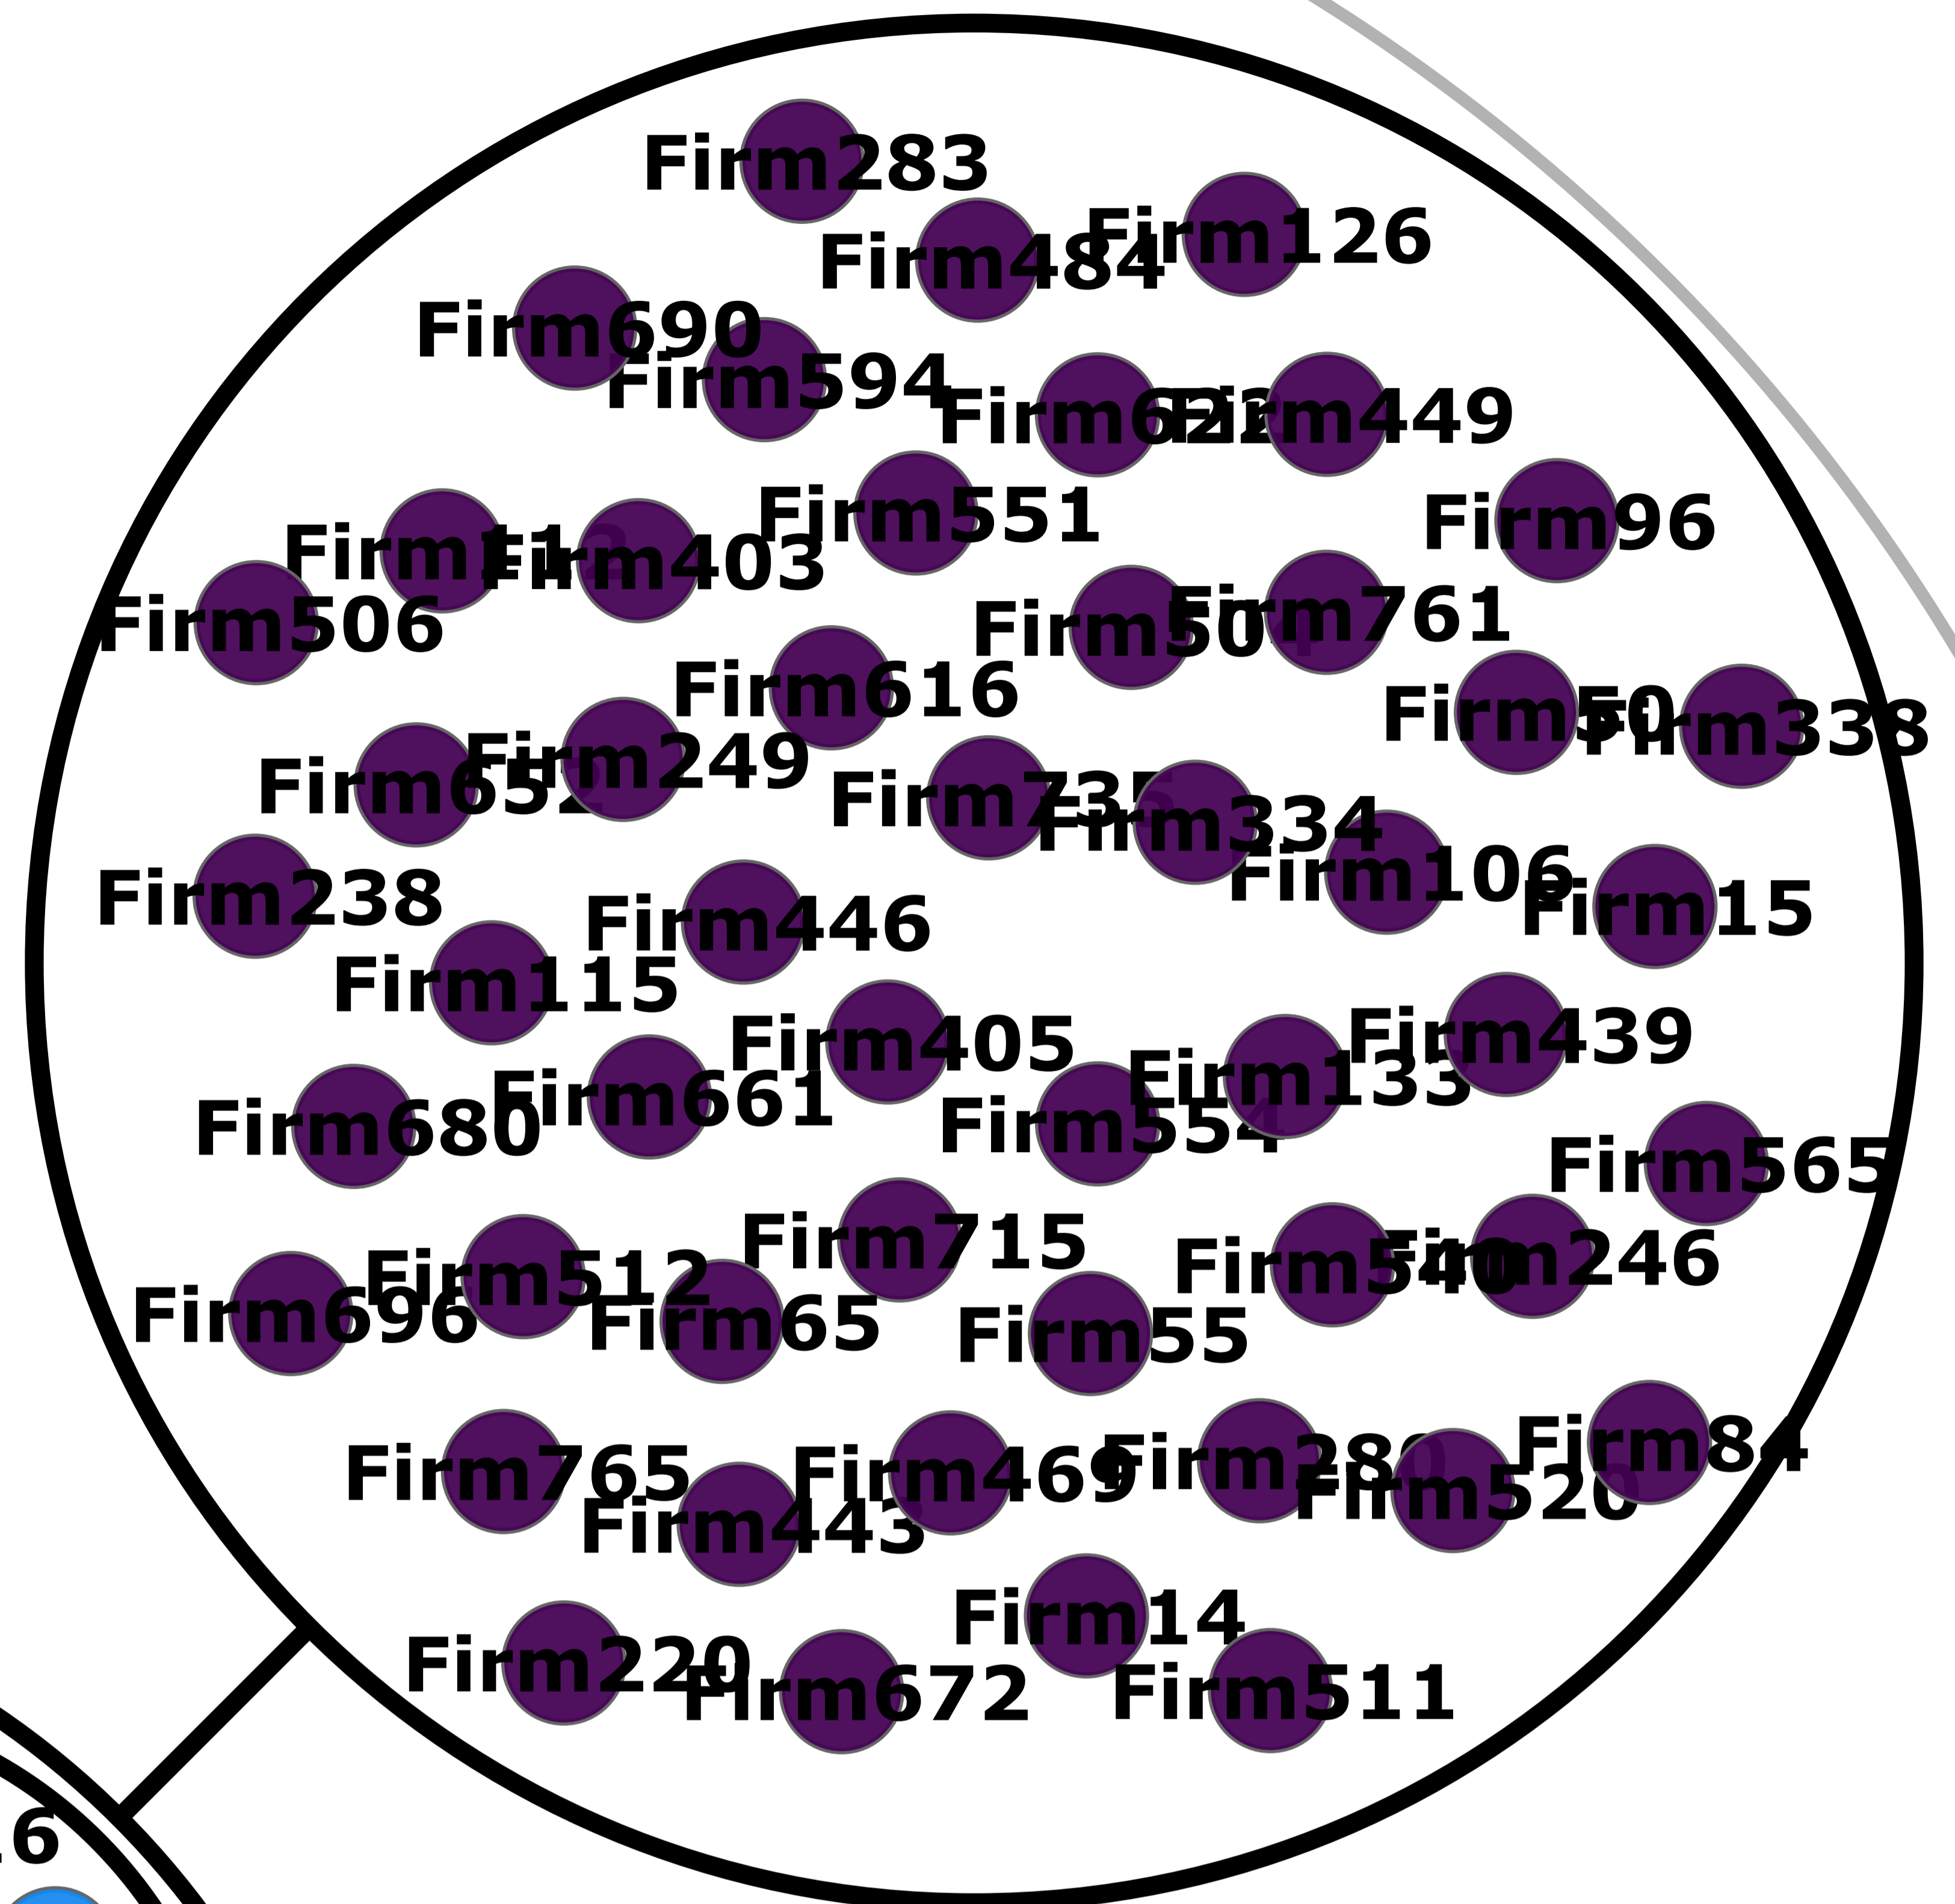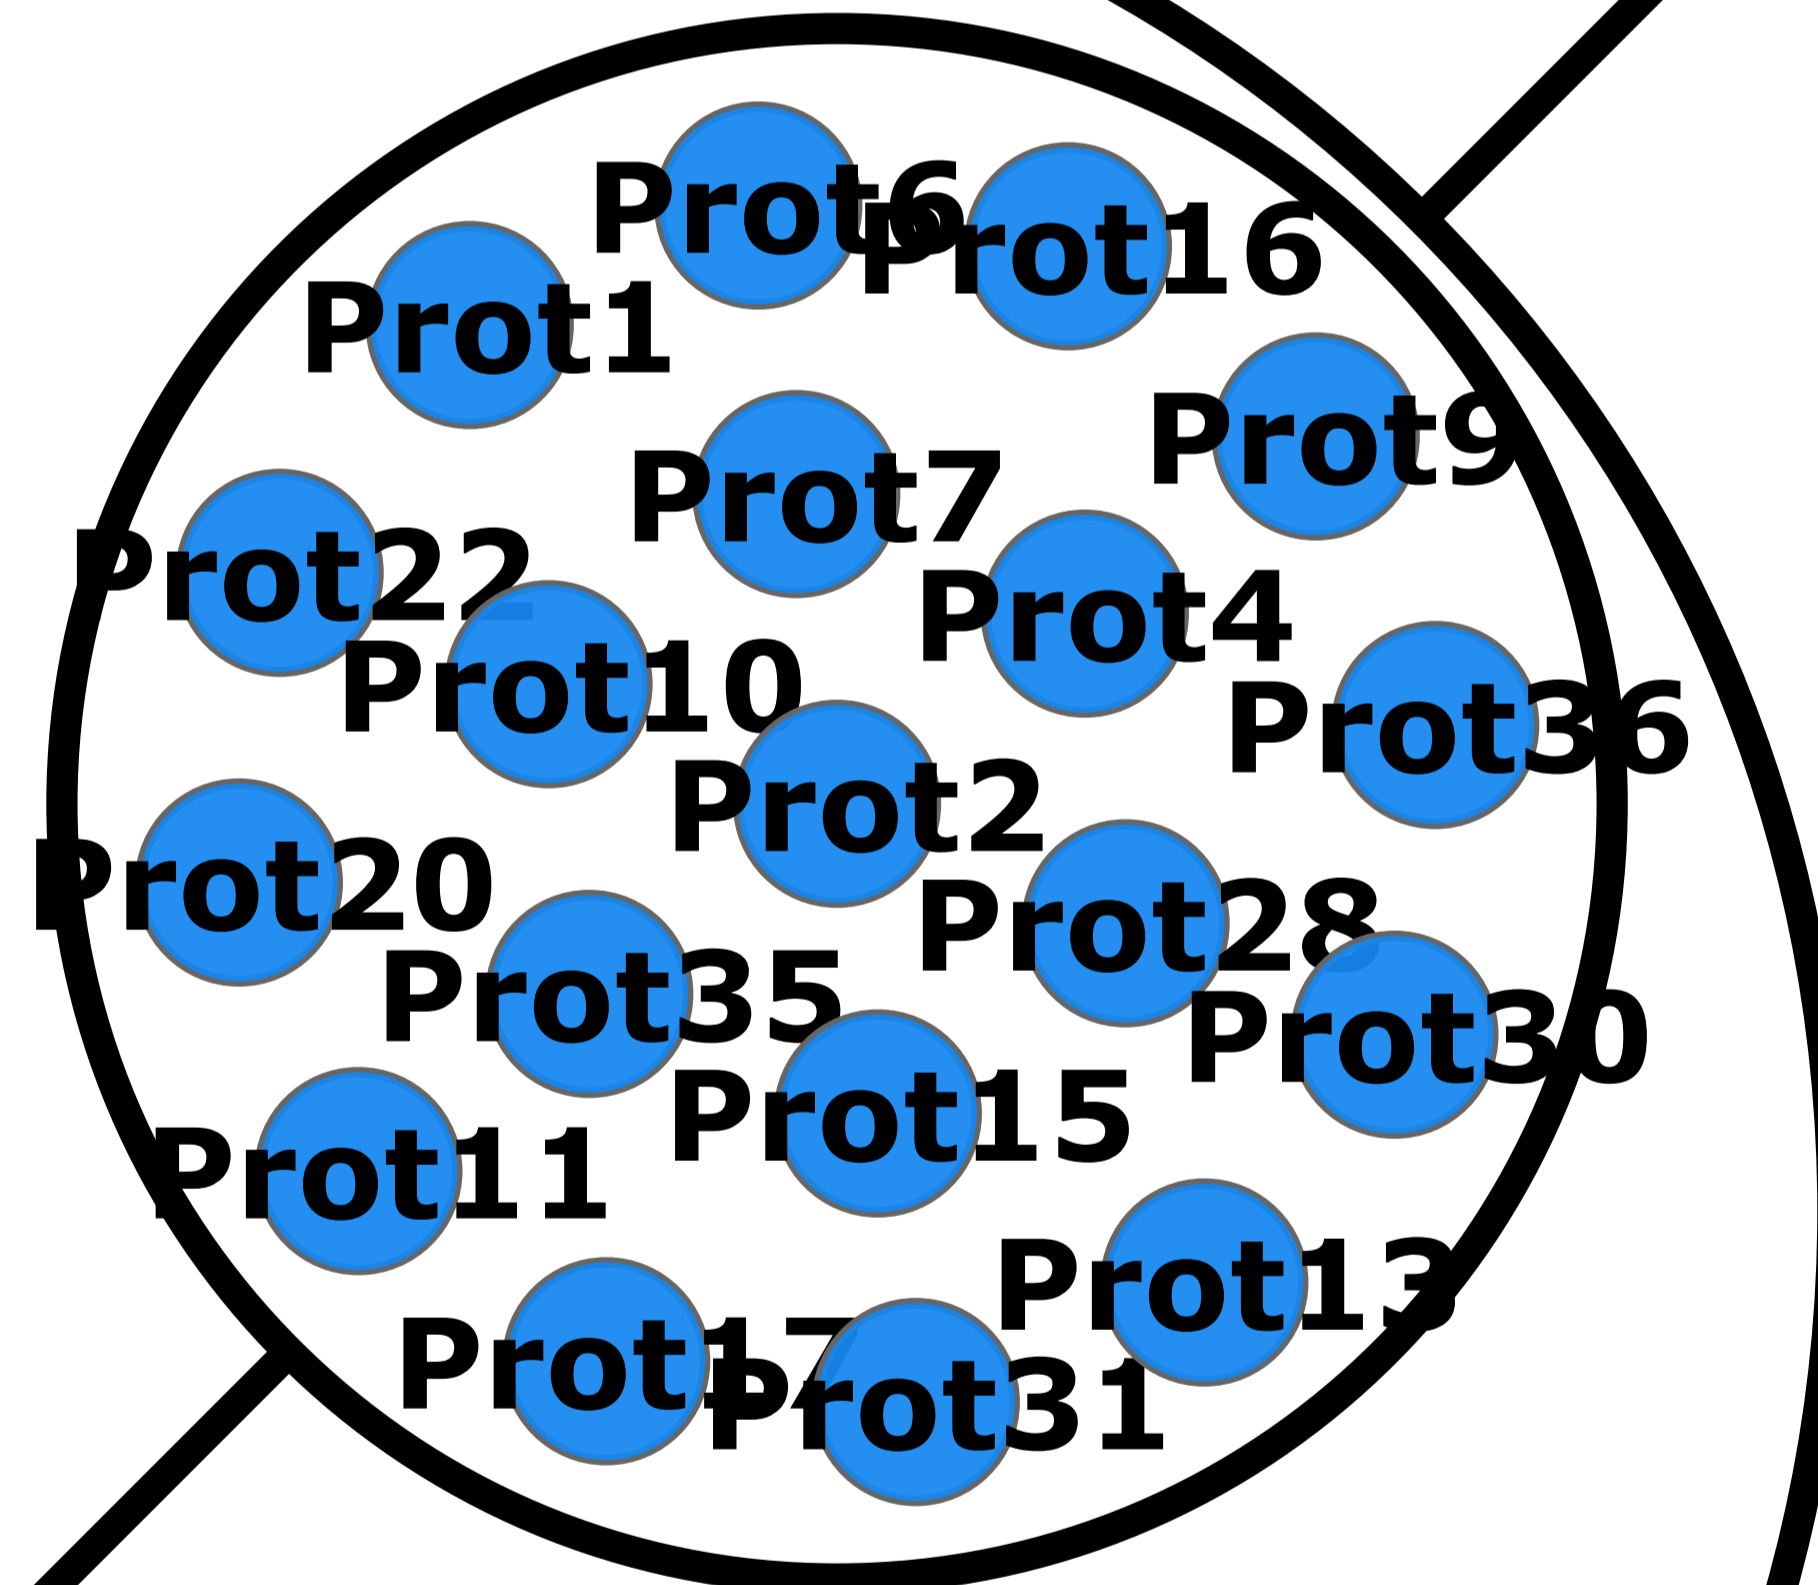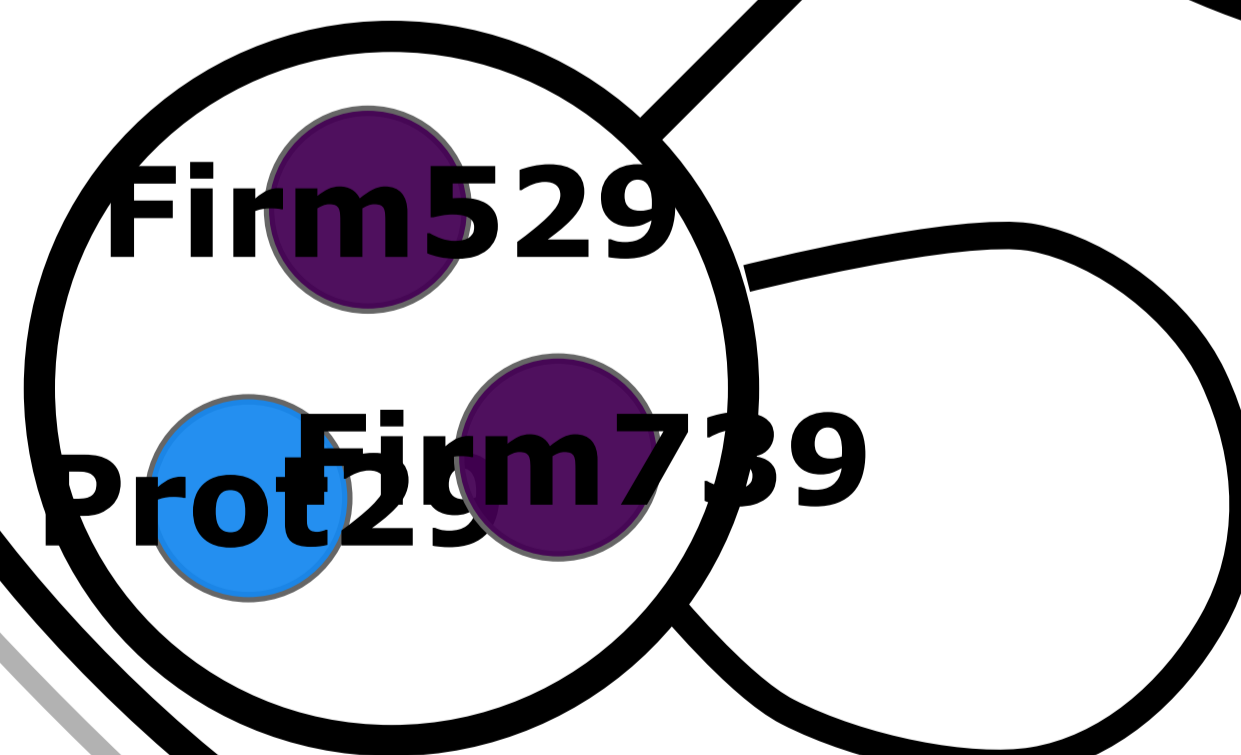

- Actinobacteria
- Bacteroidetes
- Firmicutes
- Fusobacteria
- Proteobacteria
