# Supplementary figures and images for: Metage2Metabo, microbiota-scale metabolic complementarity for the identification of key species
Source: eLife journal article supplement (doi:10.7554/elife.61968), 2020-12-29

Sugar derivatives

- Actinobacteria
- Bacteroidetes
- Firmicutes
- Fusobacteria
- Proteobacteria

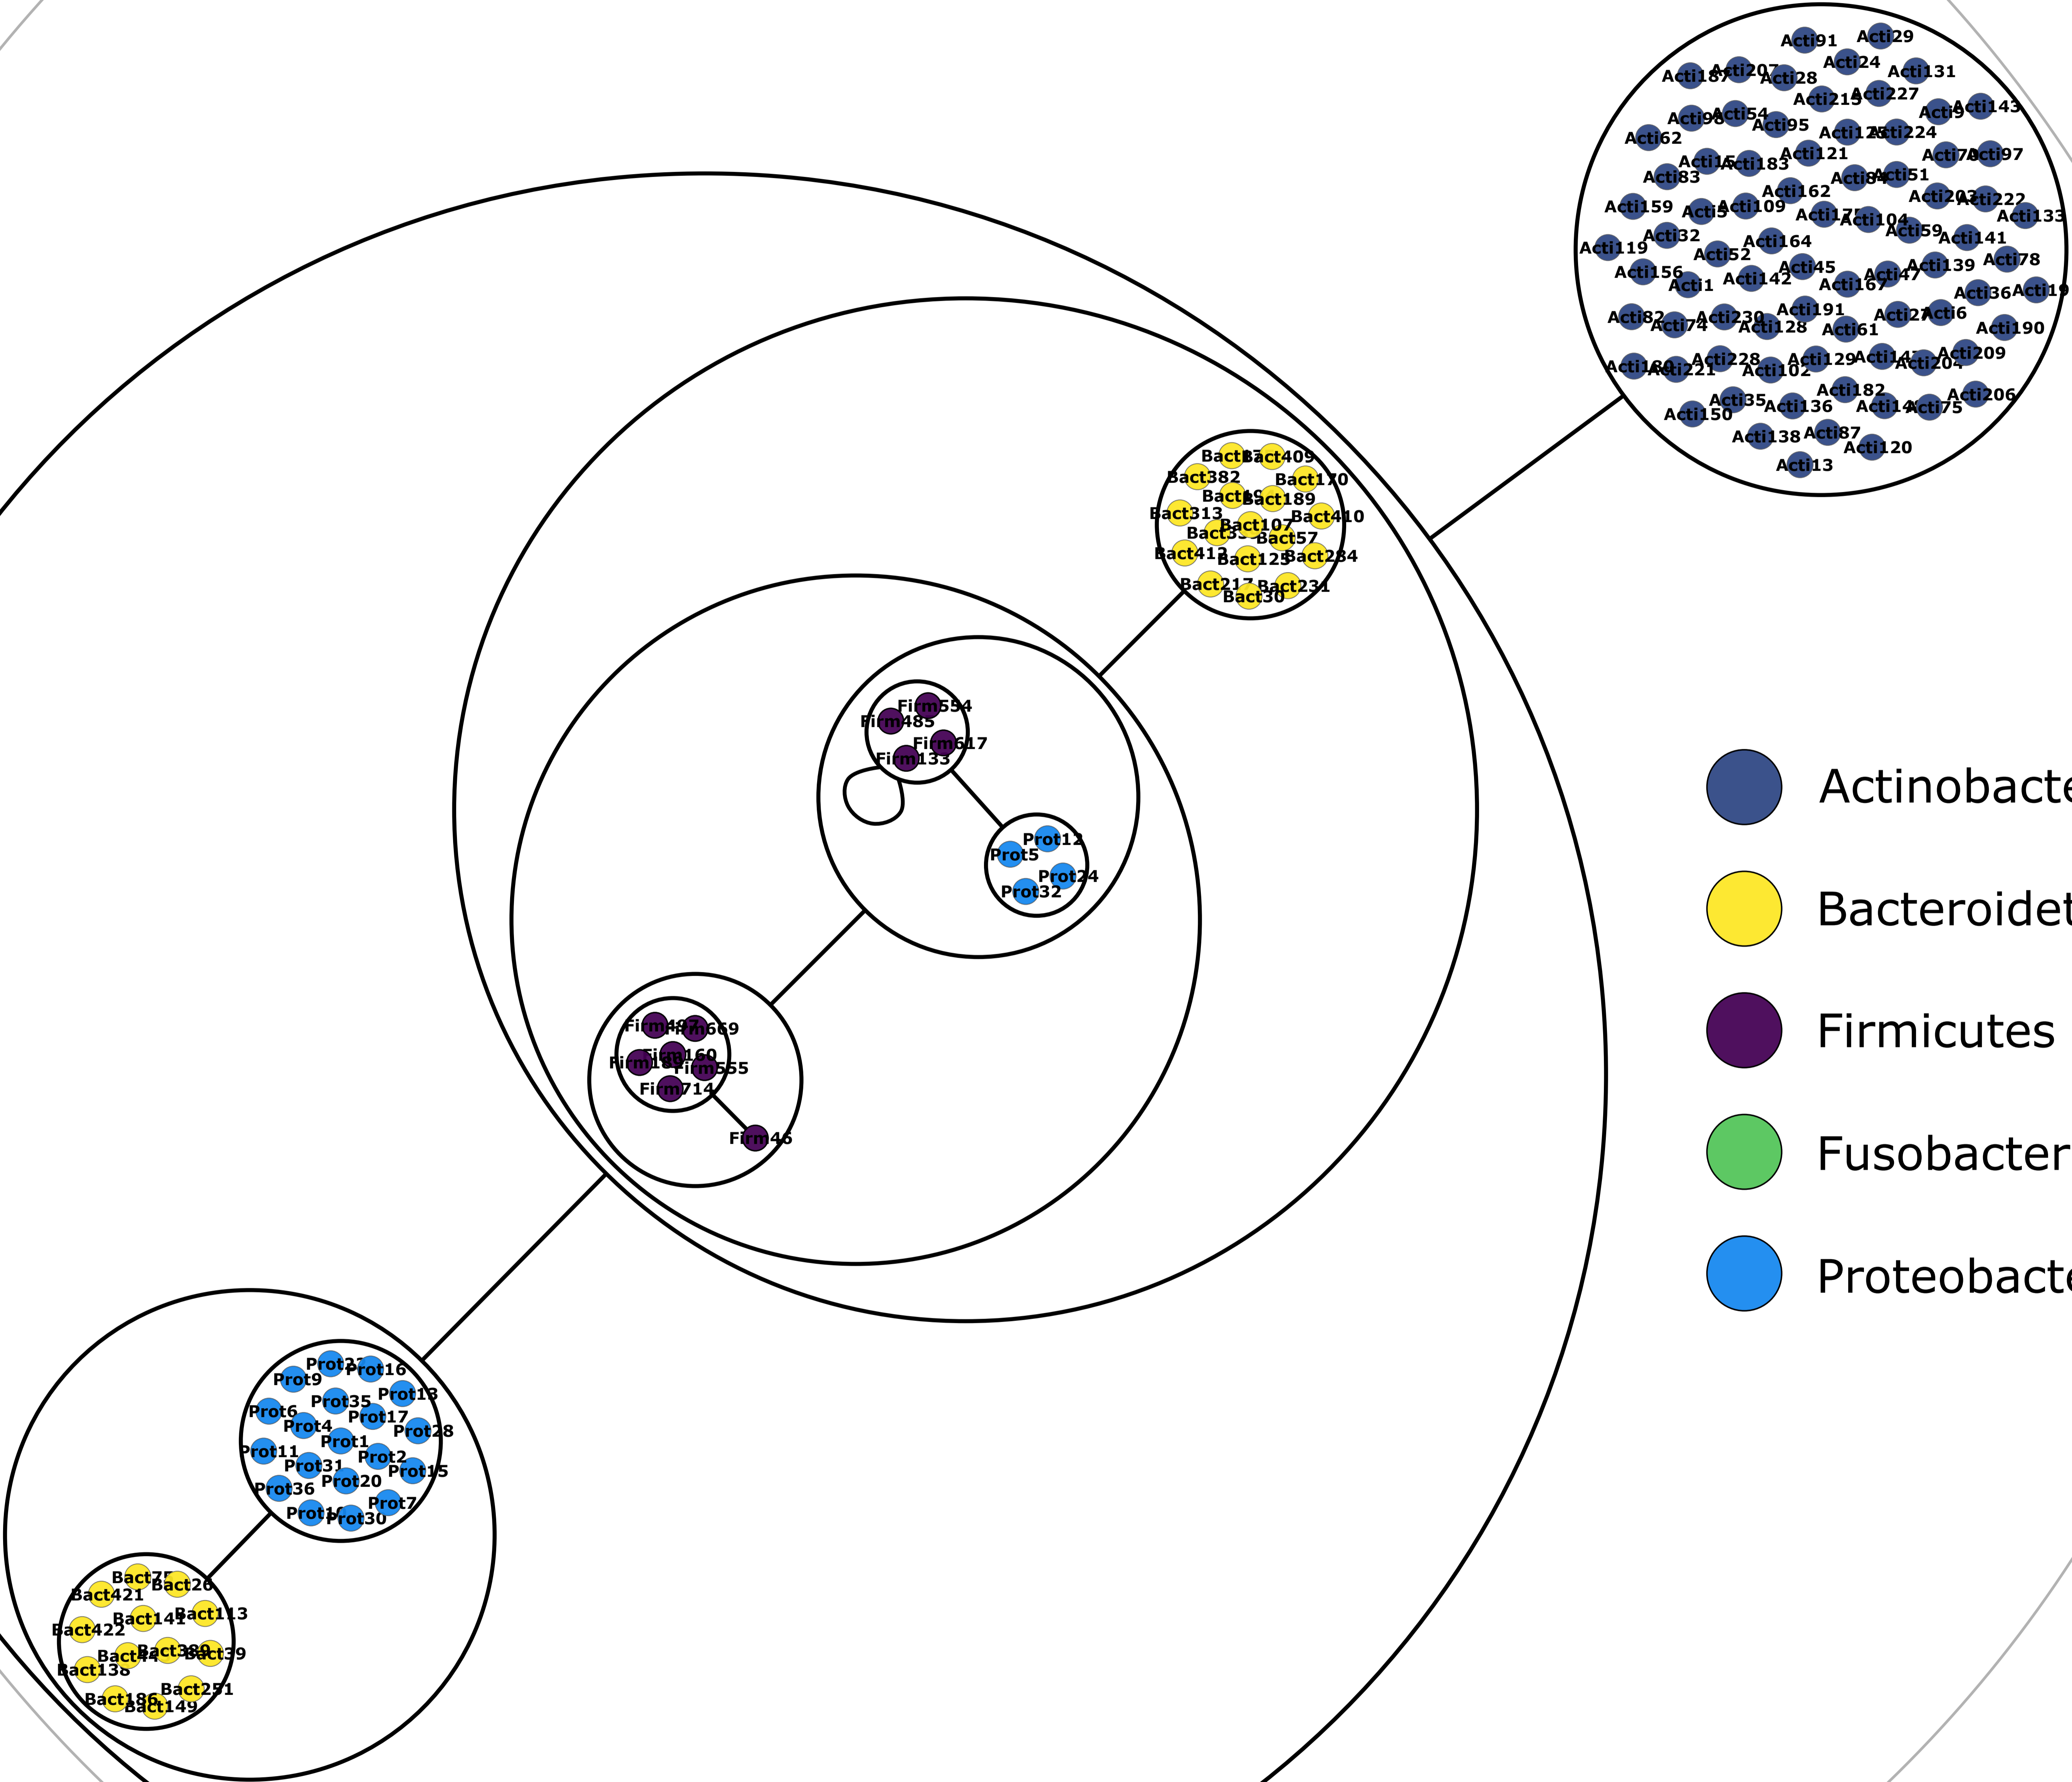

Supplement: supp [file elife-61968-supp-v1.zip › elife_poa_e61968_Figure_3_figure_supplement_1.pdf]

Lipids

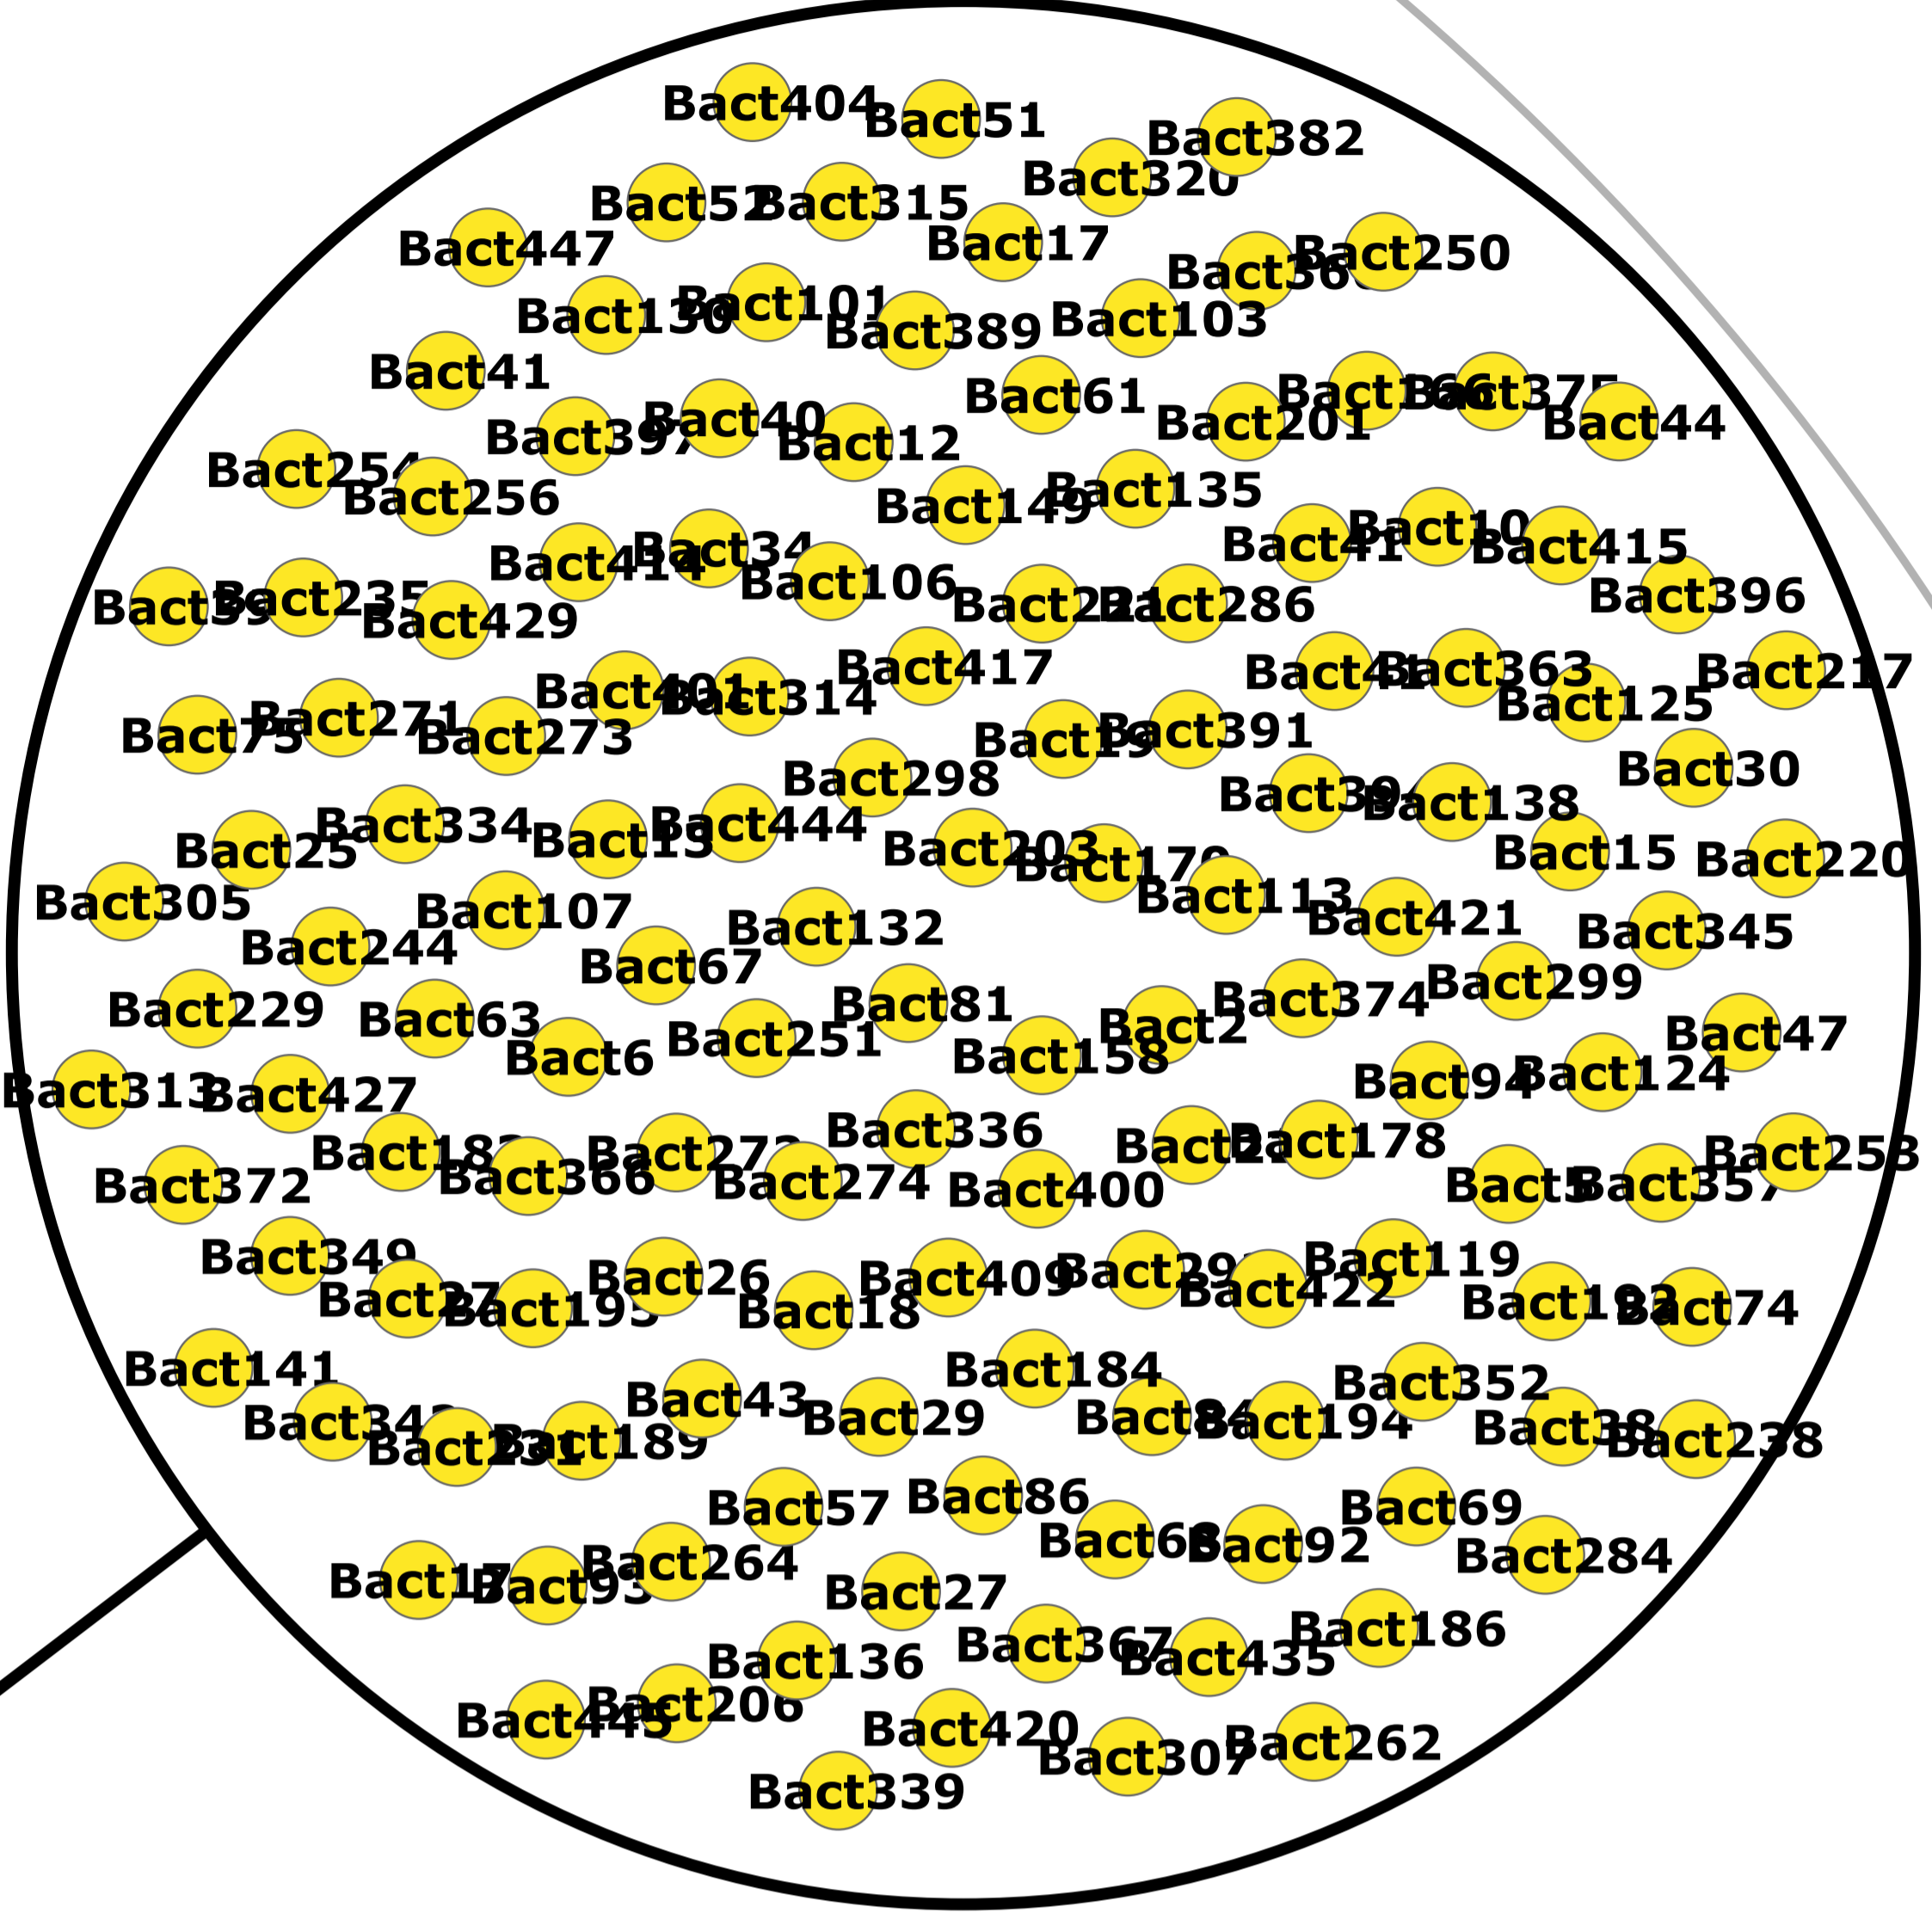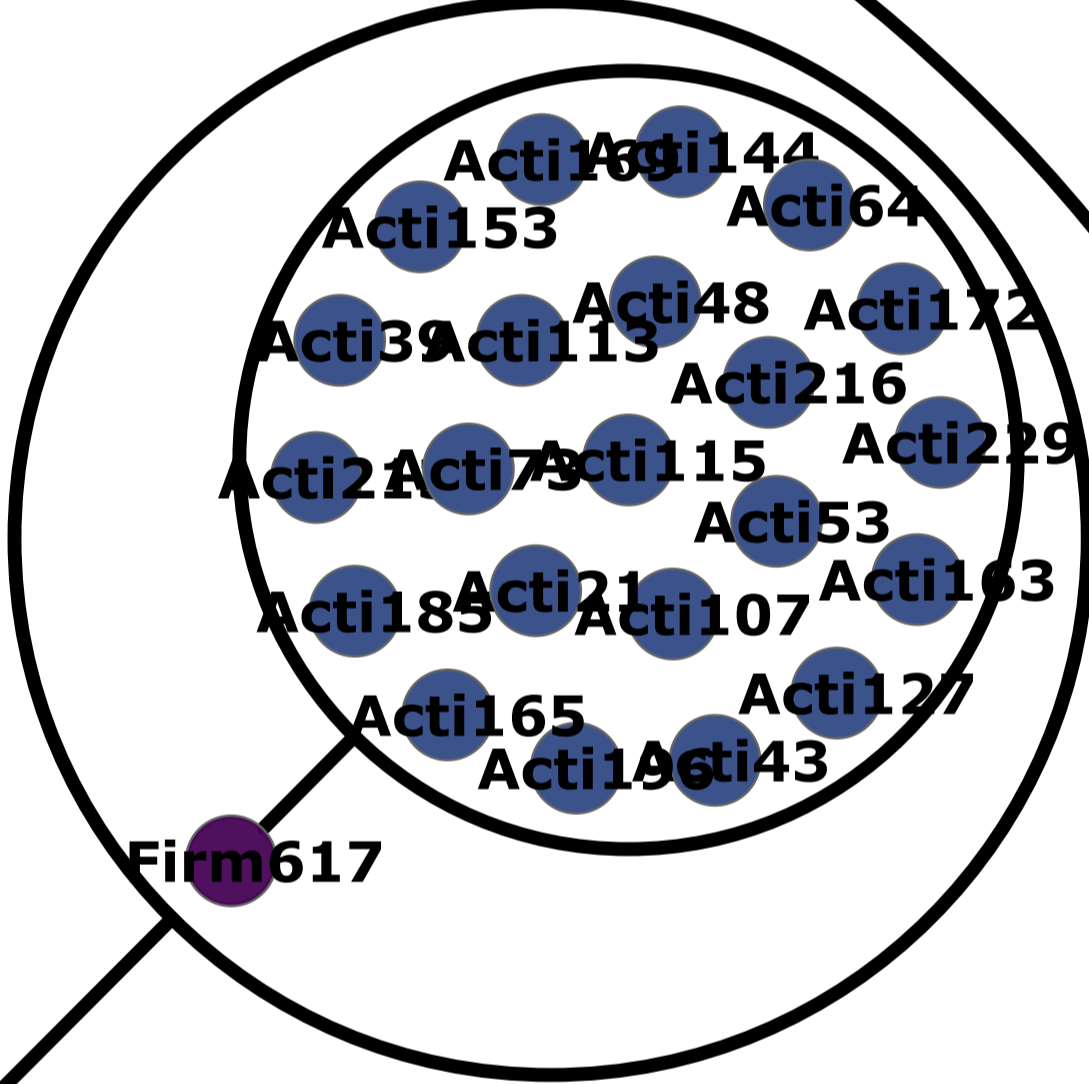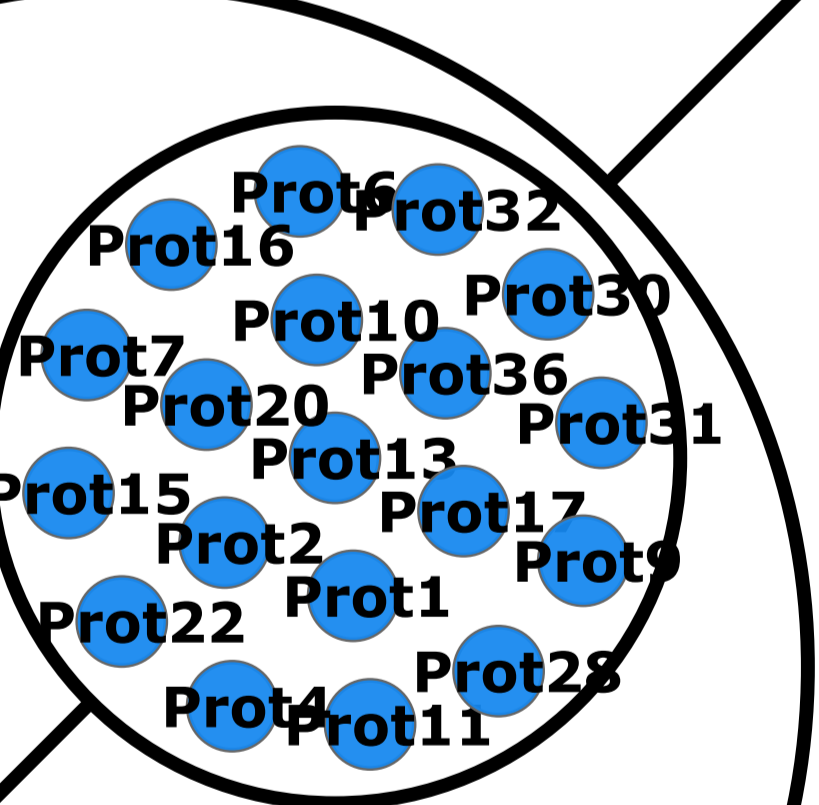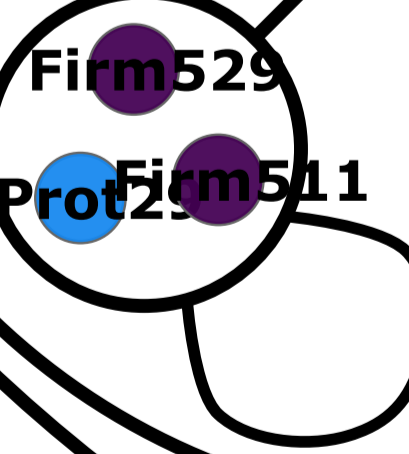

- Actinobacteria
- Bacteroidetes
- Firmicutes
- Fusobacteria
- Proteobacteria

Supplement: supp [file elife-61968-supp-v1.zip › elife_poa_e61968_Figure_3_figure_supplement_2.pdf]

Carboxy-acids

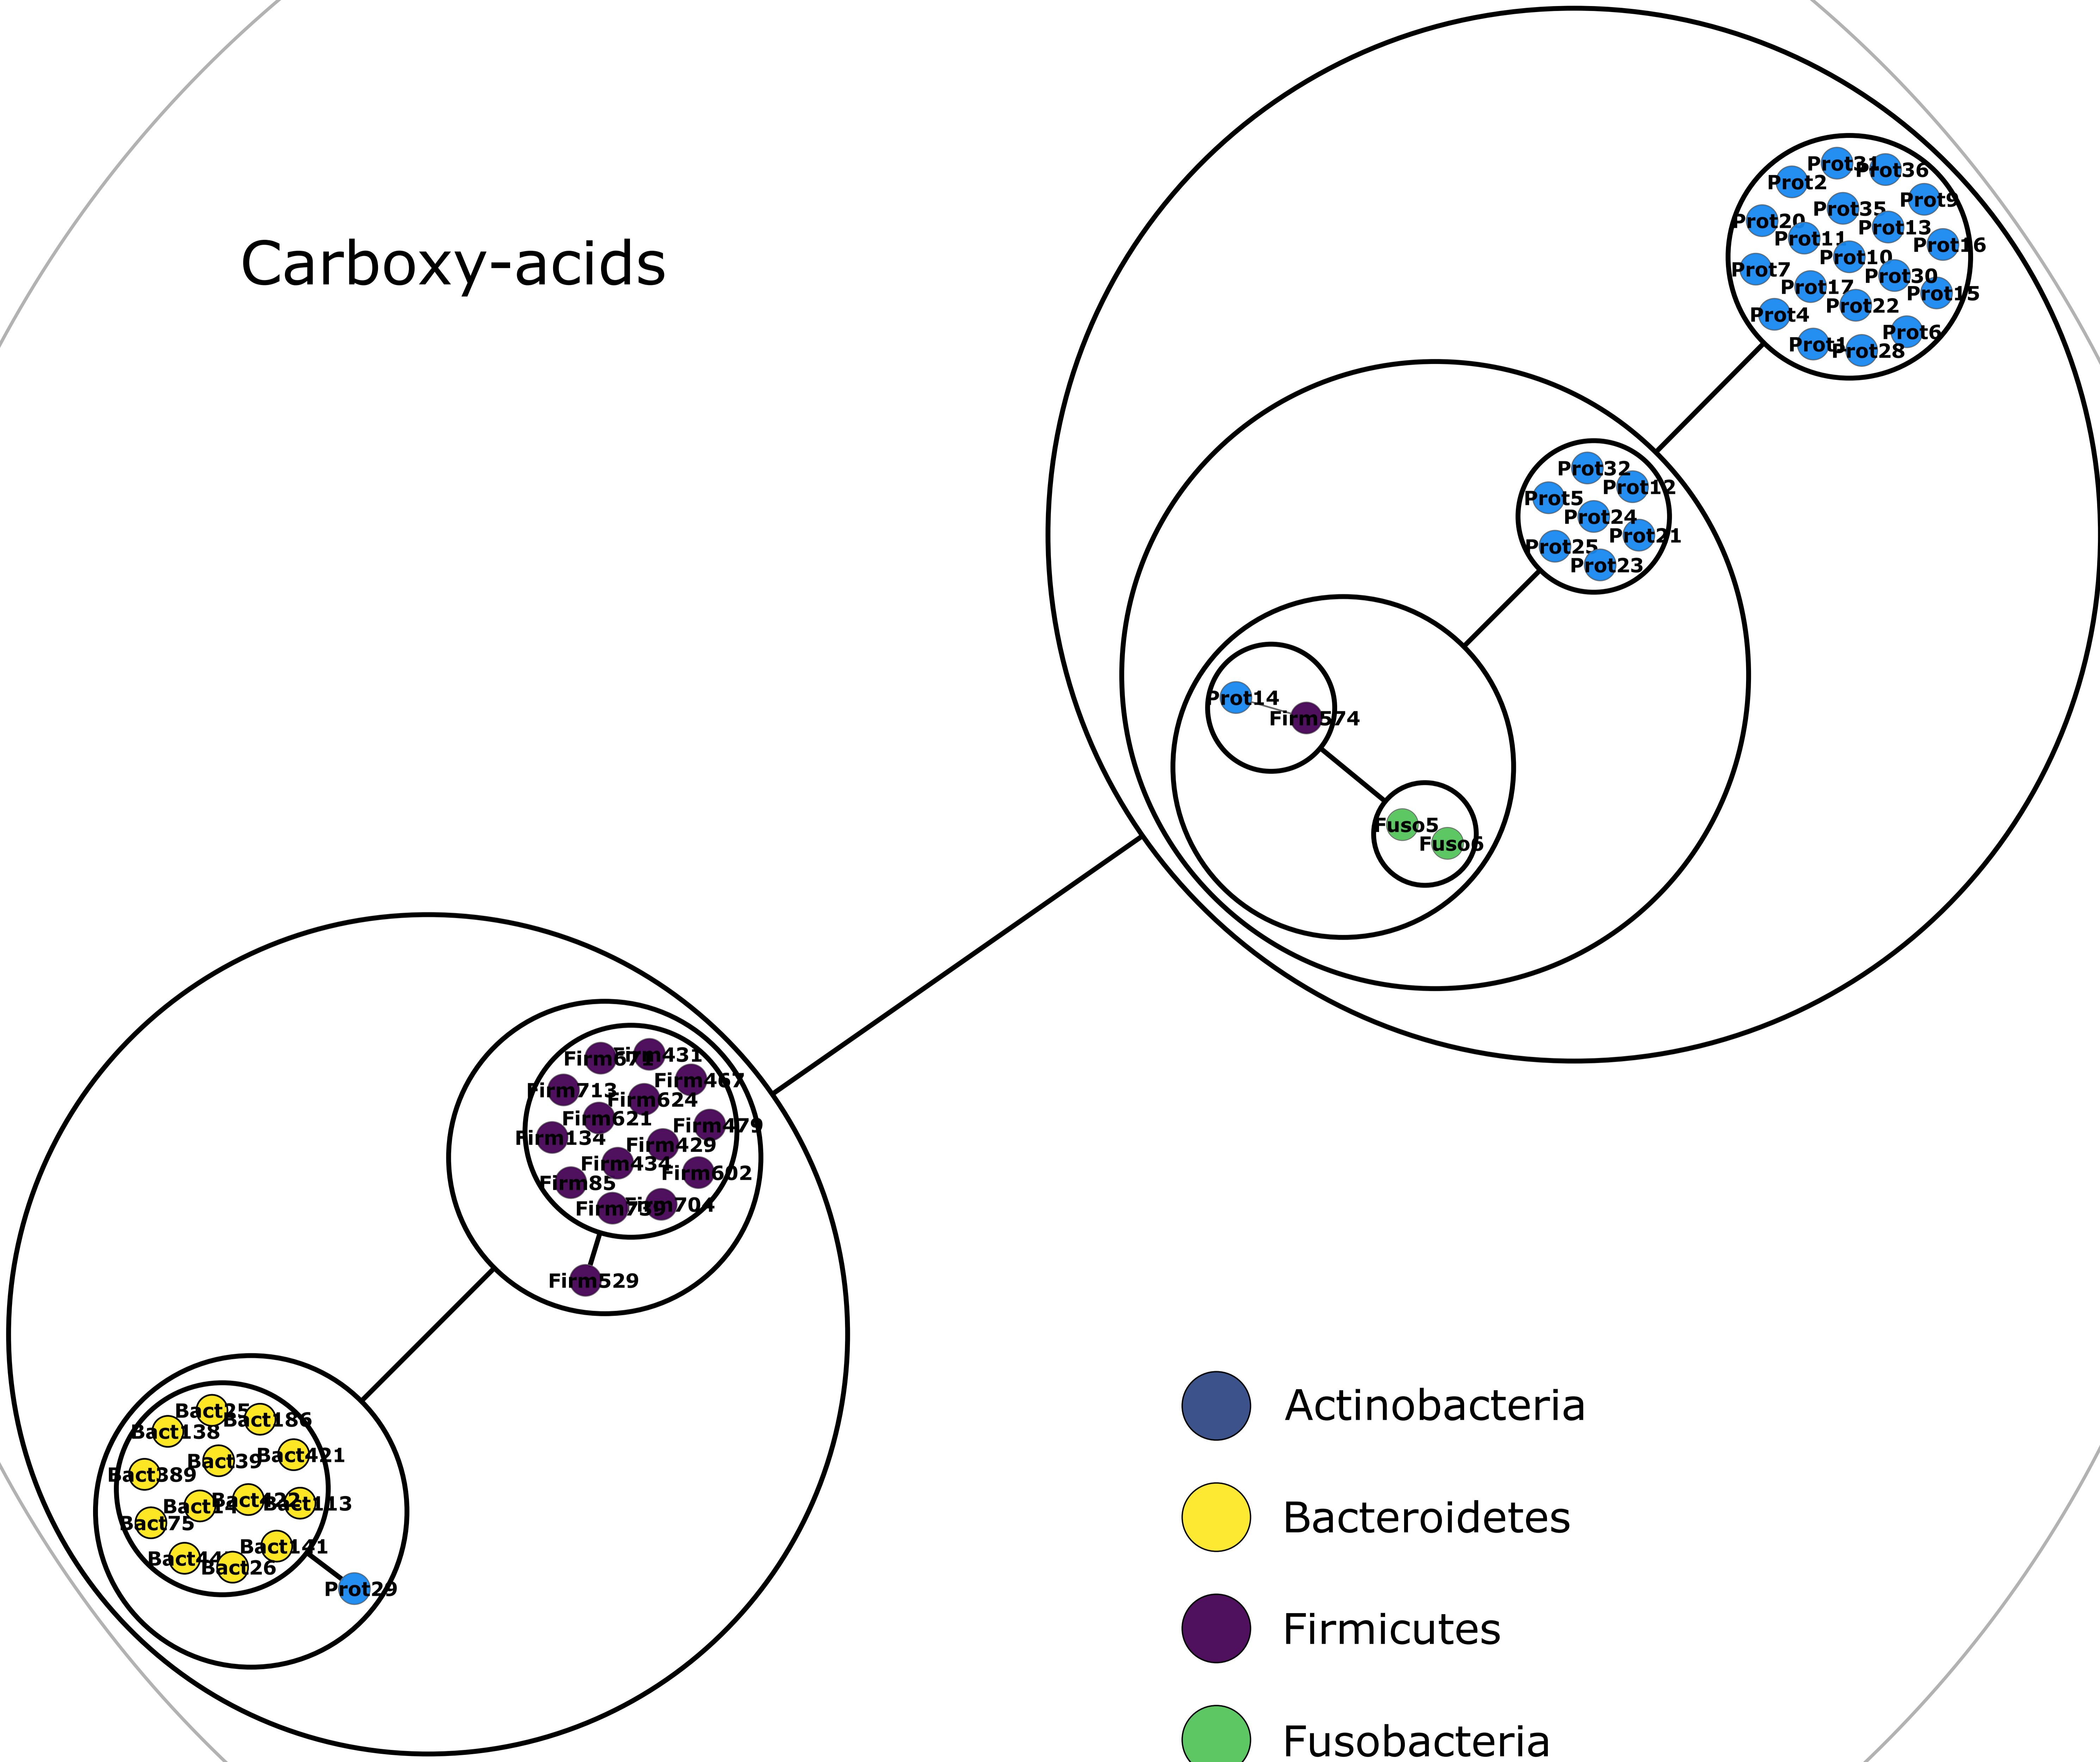

- Actinobacteria
- Bacteroidetes
- Firmicutes
- Fusobacteria
- Proteobacteria

Supplement: supp [file elife-61968-supp-v1.zip › elife_poa_e61968_Figure_3_figure_supplement_5.pdf]

CoA derivatives

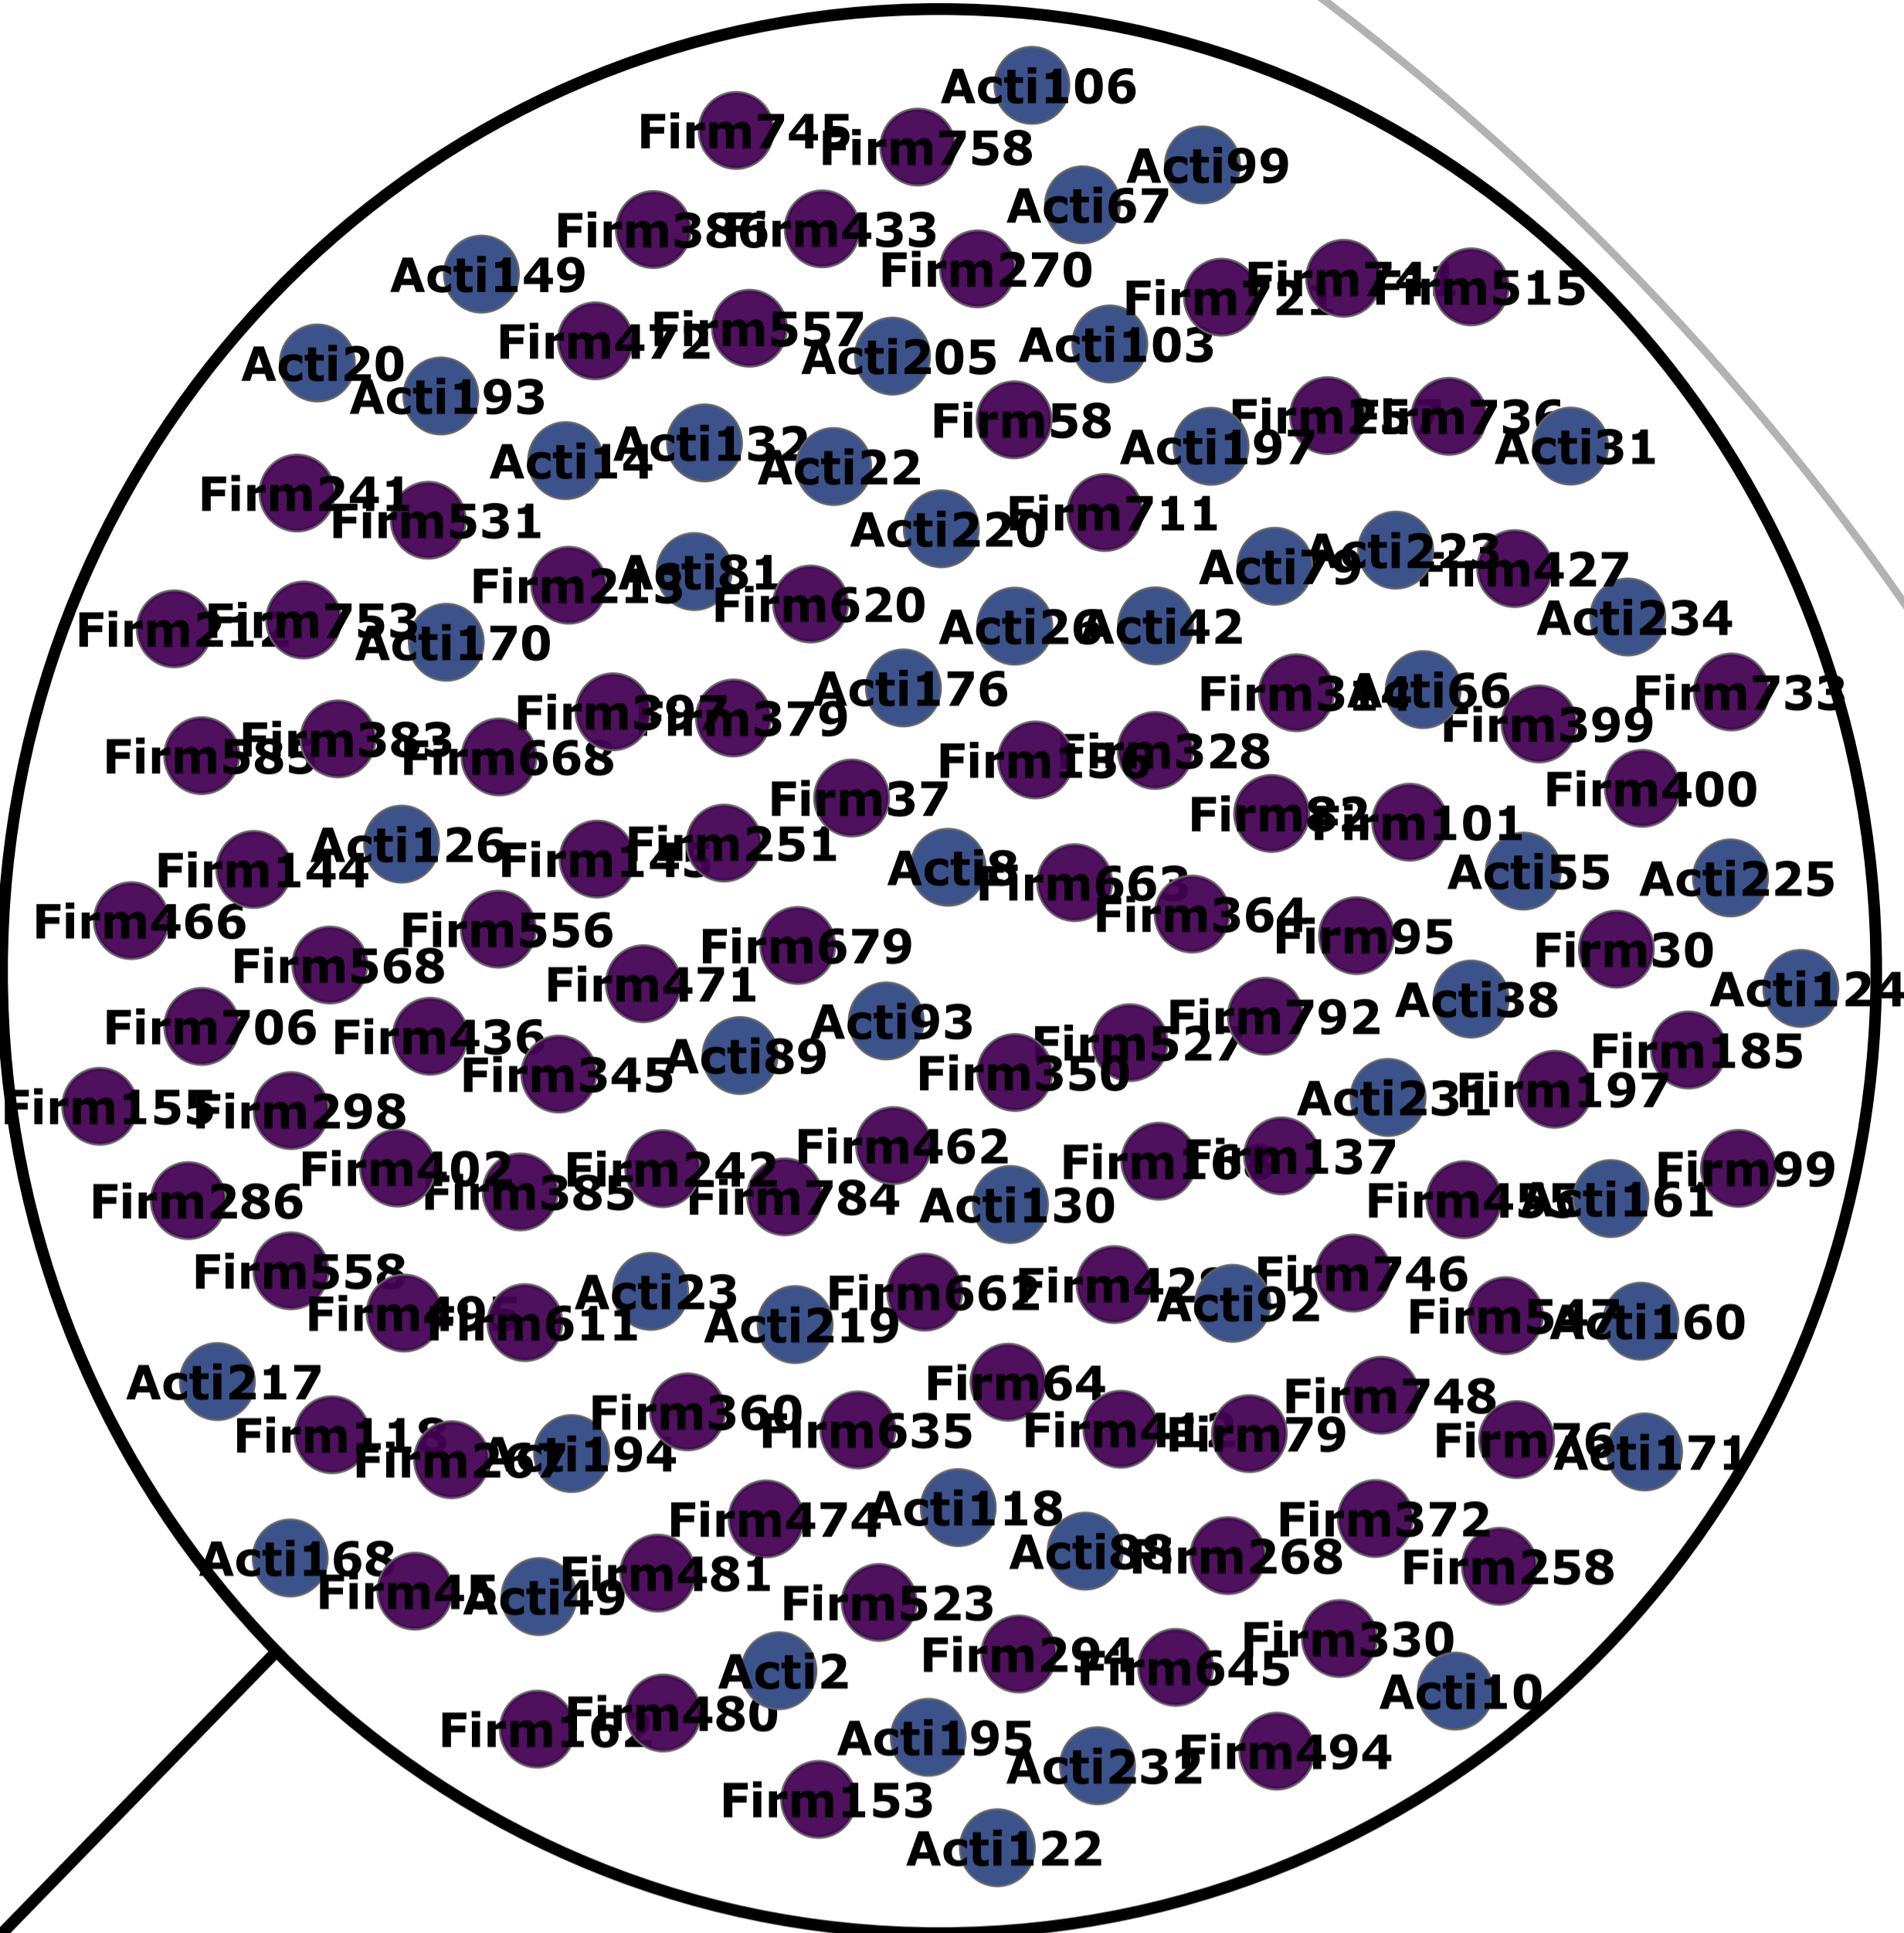

- Actinobacteria
- Bacteroidetes
- Firmicutes
- Fusobacteria
- Proteobacteria

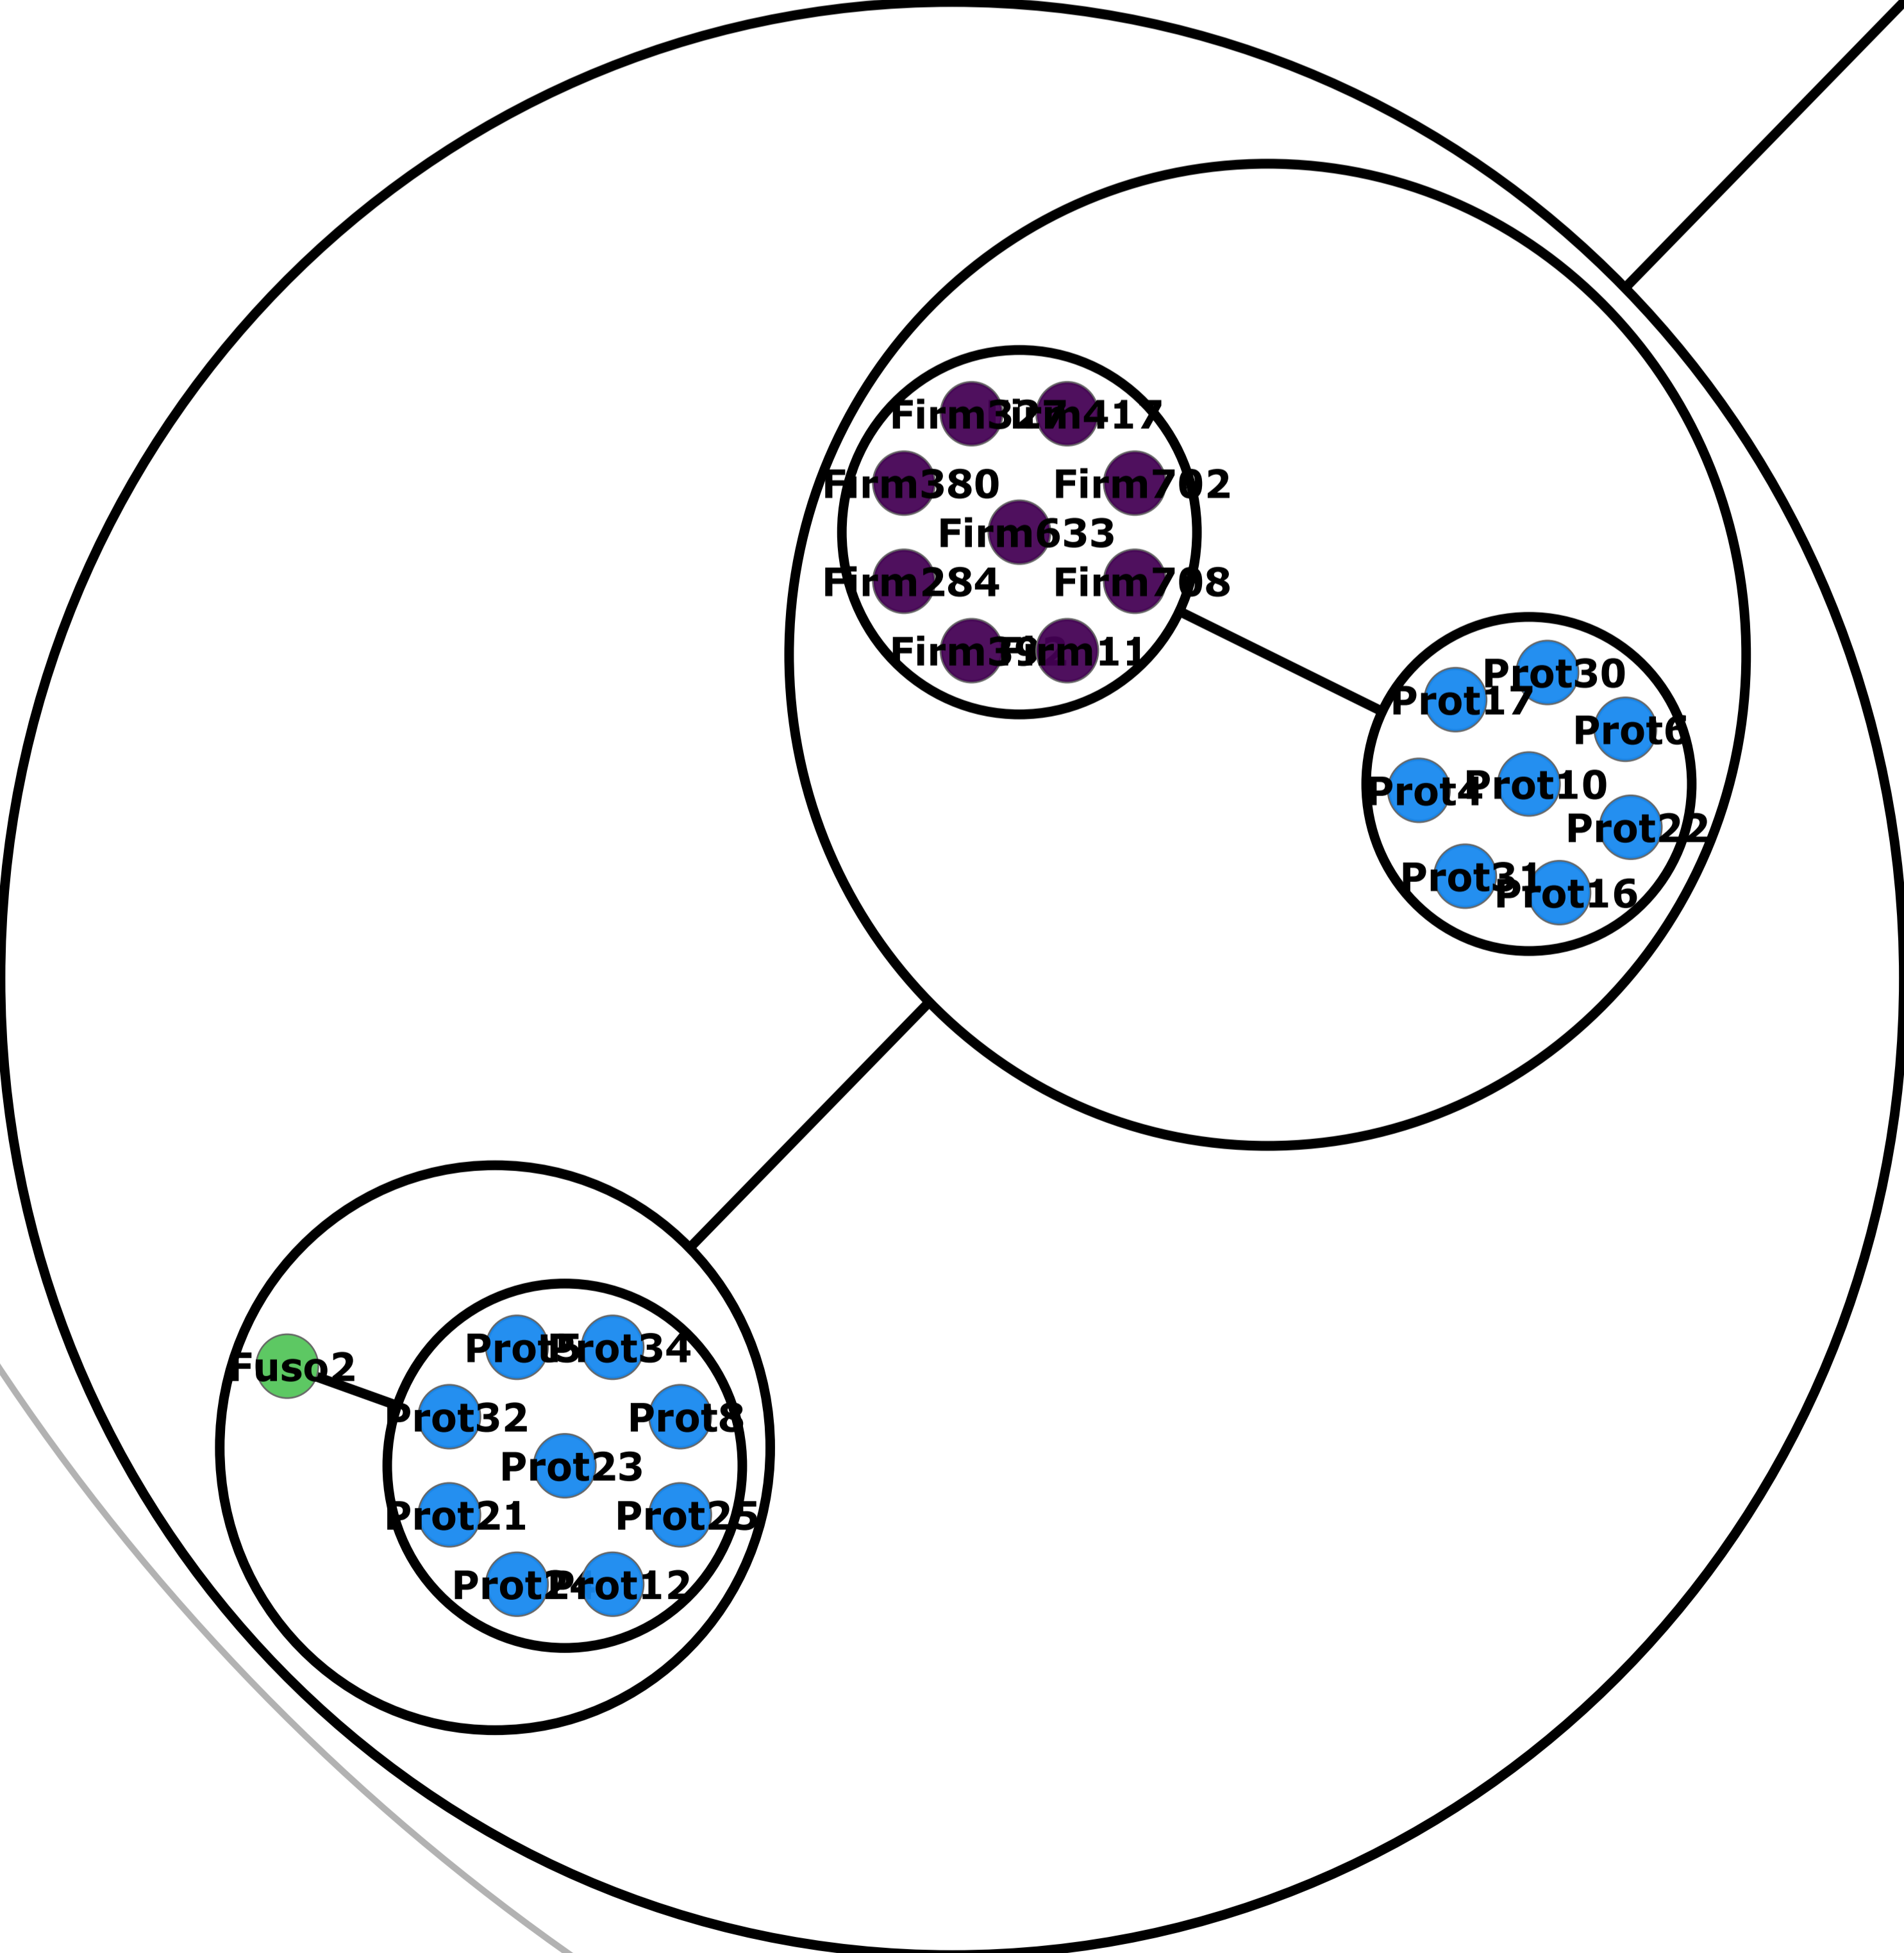

Supplement: supp [file elife-61968-supp-v1.zip › elife_poa_e61968_Figure_3_figure_supplement_6.pdf]
